# Supplementary material for: Psychopathy in Iran: Developing and Validating a Persian Version of the Comprehensive Assessment of Psychopathic Personality- Self-Report (CAPP-SR)
Source: Springer Nature journal article supplement (doi:10.1007/s10862-023-10037-9), 2023-03-18
Supplement: MOESM1 [file 24639512]

Table S1.

*Means, Paired Correlations and t-tests Between English (EN) and Persian (PE) CAPP-SR Item Ratings*

| Items | *r* | EN, M (SD) | PE, M (SD) | *t* |
| --- | --- | --- | --- | --- |
| Being close to others is very important to me | .61** | 3.05 (.82) | 3.05 (.82) | .00 |
| People have described me as a loner | .58** | 1.50 (.60) | 1.35 (.67) | 1.14 |
| I often find socializing with others annoying or unpleasant | .87** | 1.60 (.88) | 1.50 (.88) | 1.00 |
| Being unfaithful doesn't trouble me | .73** | 2.50 (1.43) | 2.30 (1.43) | 0.31 |
| I feel little or no loyalty to others | .90** | 2.70 (1.16) | 2.40 (1.35) | 0.53 |
| Unless they are of use to me, I don't keep the same friends for very long | .62** | 1.50 (.60) | 1.35 (.48) | 1.37 |
| I can easily relate to other people's feelings | .68** | 3.15 (.58) | 3.45 (.60) | -2.85* |
| I would hate to hurt another person's feelings | 1.00** | 2.50 (1.43) | 2.50 (1.43) | 0.00 |
| Watching others in pain doesn't really bother me | .84** | 1.25 (.55) | 1.15 (.36) | 1.45 |
| I am often described as a kind person | .66** | 3.70 (.57) | 3.80 (.52) | -1.00 |
| Others generally view me as a considerate person | .68** | 3.50 (.60) | 3.75 (.44) | -2.51* |
| I have been called thoughtless before | .74** | 1.35 (.58) | 1.30 (.47) | 0.56 |
| I have no difficulty keeping focused on a task | .81** | 2.65 (.81) | 2.70 (1.03) | -0.37 |
| I quickly lose interest in tasks I have started | .78** | 2.00 (.97) | 1.90 (.96) | 0.69 |
| Others often call me lazy | .74** | 1.40 (.50) | 1.35 (.58) | 0.56 |
| I say I will do things but rarely follow through | .83** | 1.95 (.99) | 1.95 (.94) | 0.00 |
| I make a point to keep my promises | 1.00** | 3.55 (.51) | 3.55 (.51) | -1.00 |
| I keep commitments I have made | .57** | 3.60 (.50) | 3.70 (.47) | 0.00 |
| I have made many hasty decisions without thinking them through | .82** | 2.30 (.97) | 2.45 (.99) | -1.14 |
| I often act without thinking | .89** | 1.95 (.88) | 1.75 (.91) | 2.17* |
| I take lots of risks | .82** | 2.25 (.85) | 2.60 (1.04) | -2.66* |
| I am a bit "fidgety" | .61** | 2.35 (.81) | 2.65 (.98) | -1.67 |
| I have a difficult time sitting still for long periods | .75** | 2.60 (1.09) | 2.45 (.99) | 0.90 |
| People often complain that I can't sit still | .79** | 1.85 (.87) | 2.15 (1.08) | -2.04* |
| It is important to follow rules | .96** | 3.35 (.81) | 3.40 (.82) | -1.00 |
| Items | ***r*** | **EN, M (SD)** | **PE, M (SD)** | ***t*** |
| I admit, I am difficult to control | .79** | 2.35 (1.18) | 2.25 (1.25) | 0.56 |
| I resent people in positions of authority | .75** | 2.05 (0.94) | 1.95 (0.88) | 0.69 |
| I intimidate others around if needed | .58** | 1.90 (1.02) | 1.55 (0.88) | 1.78 |
| I use violence to control others | .49* | 1.40 (0.82) | 1.15 (0.48) | 1.56 |
| I have no problem being violent with others if the situation calls for it | .87** | 1.70 (0.86) | 1.70 (0.92) | 0.00 |
| It is healthy to trust people | .77** | 3.05 (0.60) | 3.00 (0.56) | 0.56 |
| I don't trust anyone | .85** | 1.65 (0.74) | 1.45 (0.75) | 2.17* |
| I always keep an eye out for what others might do to me | .85** | 2.55 (0.82) | 2.55 (0.88) | 0.00 |
| I get bored easily and lose focus | .76** | 2.20 (0.83) | 2.45 (0.75) | -2.03* |
| I am easily distractible | .66** | 2.20 (0.89) | 2.35 (0.93) | -0.90 |
| It is often difficult for me to pay attention to things | .76** | 2.05 (0.82) | 1.95 (0.75) | 0.80 |
| People who do not agree with me are idiots | .70** | 1.40 (0.59) | 1.30 (0.57) | 1.00 |
| Most people are generally losers | .83** | 1.45 (0.68) | 1.40 (0.68) | 0.56 |
| Other people are mostly in my way | .82** | 1.50 (0.68) | 1.45 (0.60) | 0.56 |
| I am a stubborn person | .86** | 2.15 (0.98) | 2.10 (0.96) | 0.43 |
| I find it hard to back down from an argument even if I'm losing | .55* | 1.85 (0.87) | 2.00 (0.97) | -0.76 |
| Others seem frustrated with me because they think I am rigid or inflexible | .71** | 1.55 (0.82) | 1.55 (0.88) | 0.00 |
| I am an organized person | .78** | 3.15 (0.87) | 3.05 (0.75) | 0.80 |
| I often get into trouble for not planning ahead | .72** | 1.55 (0.82) | 1.50 (0.68) | 0.43 |
| I plan things out carefully | .83** | 3.20 (0.76) | 3.20 (0.83) | 0.00 |
| I frequently find myself in arguments with others | .97** | 2.80 (1.31) | 2.30 (1.41) | 0.82 |
| I seem to argue with others for no reason | .46* | 1.25 (0.44) | 1.25 (0.44) | 0.00 |
| Some people probably find me a bit unpleasant, but I don’t care | .72** | 2.10 (1.07) | 2.05 (1.14) | 0.27 |
| I frequently try to assume a leadership position | .88** | 2.80 (1.05) | 2.85 (1.08) | -0.43 |
| I prefer to be in charge | .80** | 2.90 (0.85) | 3.00 (0.91) | -0.80 |
| It is usually best if others just do what I tell them to do | .90** | 2.90 (0.99) | 2.10 (1.10) | 1.70 |
| Lying doesn't bother me | .85** | 1.35 (0.58) | 1.25 (0.55) | 1.45 |
| Let's face it, I'm pretty good at lying | .86** | 1.65 (0.67) | 1.55 (0.88) | 1.00 |
| Items | ***r*** | **EN, M (SD)** | **PE, M (SD)** | ***t*** |
| I think telling the truth is the best policy | .76** | 2.95 (0.82) | 3.05 (0.75) | -0.80 |
| It is sometimes necessary to exploit others to get ahead in life | .81** | 1.35 (0.58) | 1.40 (0.68) | -0.56 |
| Sometimes it is frankly necessary to manipulate others to achieve something | .55* | 1.65 (0.67) | 1.60 (0.88) | 0.29 |
| I don't mind taking advantage of others to reach my goals | .89** | 2.50 (1.35) | 2.30 (1.41) | 0.32 |
| I can be quite slick | .62** | 2.25 (1.16) | 2.30 (1.12) | -0.22 |
| I often tell people what I think they want to hear | .76** | 2.00 (0.91) | 1.95 (0.82) | 0.37 |
| Being vague is often a good tactic | .91** | 2.35 (1.08) | 2.35 (1.08) | 0.00 |
| At times I have used "big words" to sound intelligent | .78** | 2.05 (0.94) | 2.10 (0.91) | -0.37 |
| I tend to flood people with information just to give the impression of being cooperative | .80** | 2.10 (1.02) | 2.20 (1.00) | -0.69 |
| I can go on and on with stories just to "wow" people | .91** | 1.80 (0.89) | 1.90 (1.07) | -1.00 |
| Very few things scare me | .73** | 2.40 (0.88) | 2.60 (0.99) | -1.28 |
| I am usually calm in situations that others find stressful | .65** | 2.45 (0.99) | 2.45 (0.88) | 0.00 |
| I am usually relaxed and confident in a group of strangers | .91** | 2.95 (0.94) | 2.90 (0.91) | 0.56 |
| I often feel cheerful | .82** | 3.10 (0.78) | 3.05 (0.88) | 0.43 |
| I am usually full of optimism | .89** | 2.90 (0.96) | 3.00 (0.97) | -1.00 |
| I think life is full of satisfying things | .97** | 2.90 (1.02) | 2.95 (1.05) | -1.00 |
| Others seem to think that I am not emotionally expressive | .74** | 2.00 (1.02) | 1.90 (0.96) | 0.62 |
| With the exception of anger, I have never been one to express emotions | .63** | 1.80 (0.83) | 1.85 (0.93) | -0.29 |
| I just don't feel very strongly for other people | .89** | 2.80 (1.22) | 2.30 (1.25) | -0.90 |
| People tend to find my moods unpredictable | .88** | 2.15 (0.98) | 2.10 (1.07) | 0.43 |
| I get irritated very easily | .78** | 2.10 (0.96) | 2.15 (1.08) | -0.32 |
| It doesn't take much for me to "fly off the handle" | .86** | 1.95 (0.94) | 1.75 (1.02) | 1.71 |
| I would feel no guilt if my words or actions caused someone else to get upset | .50* | 1.45 (0.68) | 1.45 (0.75) | 0.00 |
| I usually feel justified in hurting others because they will have deserved it | .65** | 1.45 (0.75) | 1.15 (0.48) | 2.34* |
| I feel bad when I do something wrong | .69** | 3.55 (0.51) | 3.60 (0.50) | -0.56 |
| I often get bored or zone out if a conversation doesn’t focus on me or my interests | .78** | 2.00 (0.91) | 2.05 (0.94) | -0.37 |
| To be honest, I don't really care about other people's opinions | .72** | 1.75 (0.96 | 1.55 (0.88) | 1.28 |
| I am mostly just interested in things that apply to me | .80** | 2.15 (0.87) | 1.85 (0.93) | 2.34* |
| Items | ***r*** | **EN, M (SD)** | **PE, M (SD)** | ***t*** |
| I am (or, will one day be) very famous | .92** | 2.05 (0.94) | 2.00 (1.02) | 0.56 |
| I am a very important person | .94** | 2.15 (0.93) | 2.05 (0.88) | 1.45 |
| I have special qualities | .84** | 2.85 (1.04) | 2.95 (0.88) | -0.80 |
| Most people are envious of my abilities | .85** | 2.20 (0.89) | 2.15 (0.98) | 0.43 |
| When compared to others, I tend to stand out | .67** | 2.35 (0.87) | 2.60 (1.04) | -1.42 |
| Most people think that I am superior to them | .80** | 2.15 (0.87) | 2.05 (0.88) | 0.80 |
| I deserve special treatment | .60** | 1.85 (0.81) | 2.00 (1.07) | -0.76 |
| I often find that I have to be quite assertive in getting what I deserve | .94** | 2.30 (1.16) | 2.50 (1.26) | 0.36 |
| I might be perceived as demanding, but I am also deserving | .47* | 2.50 (0.82) | 2.45 (0.99) | 0.23 |
| I believe I can meet almost any challenge and prevail | .93** | 3.00 (0.72) | 3.00 (0.85) | 0.00 |
| I rarely fail | .87** | 2.70 (1.03) | 2.75 (1.02) | -0.43 |
| I am not afraid to take risks | .81** | 2.70 (0.92) | 2.70 (0.92) | 0.00 |
| Others have told me that I refuse to accept responsibility for my actions | .66** | 1.50 (0.68) | 1.30 (0.57) | 1.71 |
| I get blamed for too many things that go wrong | 1.00** | 2.70 (1.16) | 2.30 (1.16) | 0.77 |
| I often end up paying for other people’s mistakes | .78** | 1.80 (0.76) | 1.80 (0.89) | 0.00 |
| I often wonder who I am | .96** | 2.00 (1.12) | 1.90 (1.11) | 1.45 |
| My view of myself as a person is quite stable | .80** | 2.85 (0.87) | 2.80 (1.00) | 0.37 |
| I can't shake the feeling that I am lacking something of importance within myself | .74** | 1.90 (0.96) | 1.85 (0.93) | 0.32 |

*Note.* EN = English original; PE = Persian version. *t* = *t*-test. **p* <.05, ***p* < .01.
